# Supplementary material
Source: PubMed Central journal article supplement (PMC11265297)
Supplement: ooae069_supplementary_data.pdf [file ooae069_supplementary_data.pdf]

**Supplemental Figure 1. Comparison of dashboard and source publication values.** Below are calculated differences between values available in the RHSP Tableau dashboard and the published values[2,3].

| Year | Round | Measure    | Community            | Source Publication | Dashboard Value | Published Value | Difference |
|------|-------|------------|----------------------|--------------------|-----------------|-----------------|------------|
| 1999 | 6     | Prevalence | Agrarian and Trading | NEJM               | 13.50           | 13.48465        | 0.01535    |
| 2000 | 7     | Prevalence | Agrarian and Trading | NEJM               | 12.80           | 12.74510        | 0.05490    |
| 2001 | 8     | Prevalence | Agrarian and Trading | NEJM               | 12.80           | 12.71117        | 0.08883    |
| 2003 | 9     | Prevalence | Agrarian and Trading | NEJM               | 12.00           | 11.87281        | 0.12719    |
| 2004 | 10    | Prevalence | Agrarian and Trading | NEJM               | 12.50           | 12.54618        | -0.04618   |
| 2005 | 11    | Prevalence | Agrarian and Trading | NEJM               | 12.40           | 12.38730        | 0.01270    |
| 2007 | 12    | Incidence  | Agrarian and Trading | NEJM               | 1.20            | 1.20000         | 0.00000    |
| 2009 | 13    | Incidence  | Agrarian and Trading | NEJM               | 1.23            | 1.23000         | 0.00000    |
|      |       | Prevalence | Agrarian and Trading | NEJM               | 13.30           | 13.34714        | -0.04714   |
| 2010 | 14    | Prevalence | Agrarian and Trading | NEJM               | 13.60           | 13.59535        | 0.00465    |
| 2012 | 15    | Incidence  | Agrarian and Trading | NEJM               | 0.84            | 0.83000         | 0.01000    |
|      |       |            | Fishing              | Lancet HIV         | 3.43            | 3.43000         | 0.00000    |
|      |       | Prevalence | Agrarian and Trading | NEJM               | 13.80           | 13.73253        | 0.06747    |
|      |       |            | Fishing              | Lancet HIV         | 41.30           | 41.30000        | 0.00000    |
|      |       |            | Fishing              | Lancet HIV         | 39.40           | 39.40000        | 0.00000    |
| 2014 | 16    | Incidence  | Agrarian and Trading | NEJM               | 0.67            | 0.66000         | 0.01000    |
|      |       | Prevalence | Agrarian and Trading | NEJM               | 13.20           | 13.10308        | 0.09692    |
| 2015 | 17    | Incidence  | Agrarian and Trading | NEJM               | 0.65            | 0.66000         | -0.01000   |
|      |       |            | Fishing              | Lancet HIV         | 2.60            | 2.57000         | 0.03000    |
|      |       | Prevalence | Agrarian and Trading | NEJM               | 13.10           | 12.70608        | 0.39392    |
|      |       |            | Fishing              | Lancet HIV         | 37.70           | 37.50000        | 0.20000    |
